# Supplementary material for: Targeting adhesion signaling in KRAS, LKB1 mutant lung adenocarcinoma
Source: JCI journal article supplement (doi:10.1172/jci.insight.90487), 2017-03-08
Supplement: sd1 [file 1]

## Supplemental Figure 1

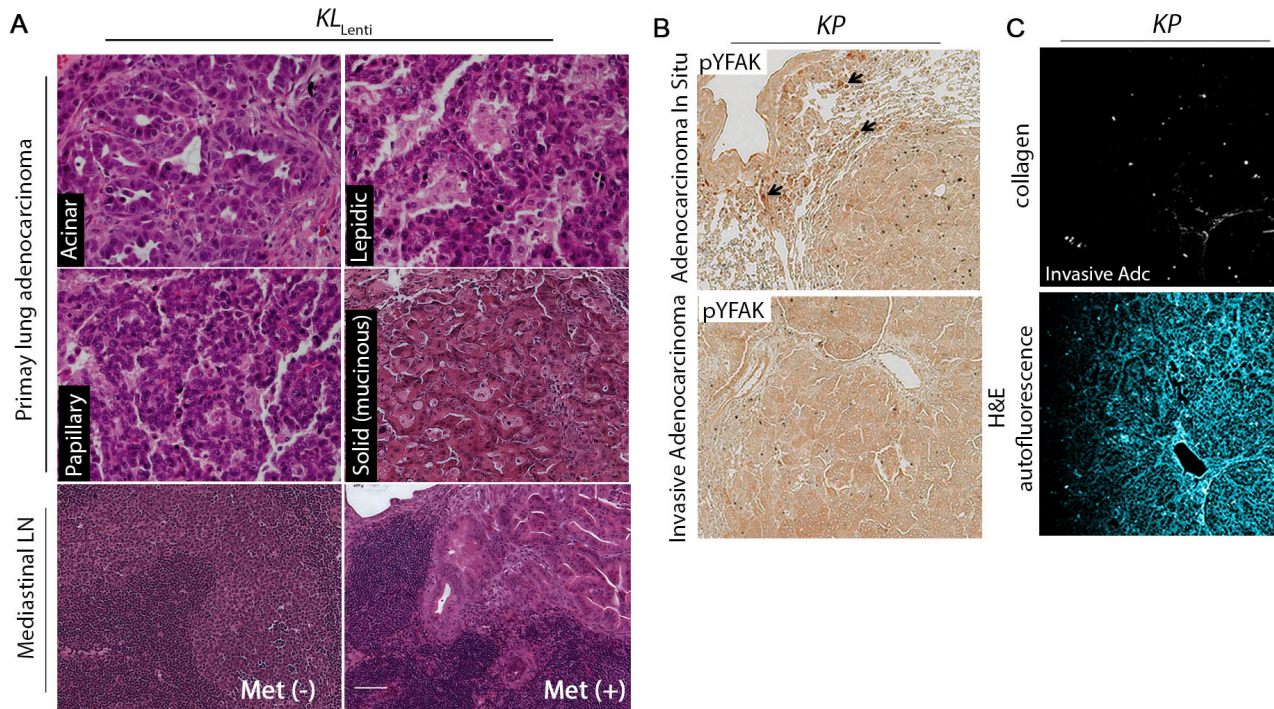

**Supplemental Figure 1. *KL<sub>Lenti</sub>* mice develop adenocarcinoma, metastasis to the mediastinal lymph nodes and *KP* mice lack high pYFAK staining and collagen levels in high-grade lung tumors.**

(A) Representative images of H&E stained primary mouse lung adenocarcinoma in the LV-Cre induced *LSL-Kras<sup>G12D</sup>; Lkb1<sup>fl/fl</sup>* (*KL<sub>Lenti</sub>*) model (n = 96 mice) of the indicated histologic subtypes (400X), and H&E stained normal and metastatic mediastinal lymph nodes (Scale bar = 100um) (n = 33 mice). (B) Representative images of immunohistochemistry (IHC) of pYFAK<sup>397</sup> in *Kras<sup>G12D</sup>, p53<sup>fl/fl</sup>* (*KP*) adenocarcinoma in situ (AIS) (top) and invasive adenocarcinoma (Inv Adc) (bottom) (200X). Black arrows mark pYFAK positive immune cells (n = 5 mice). (C) Representative images of SHG detection of collagen (top) in *KP* Inv Adc. Cell structure is visualized by H&E autofluorescence (bottom; pseudo-colored blue) (200X).

## Supplemental Figure 2

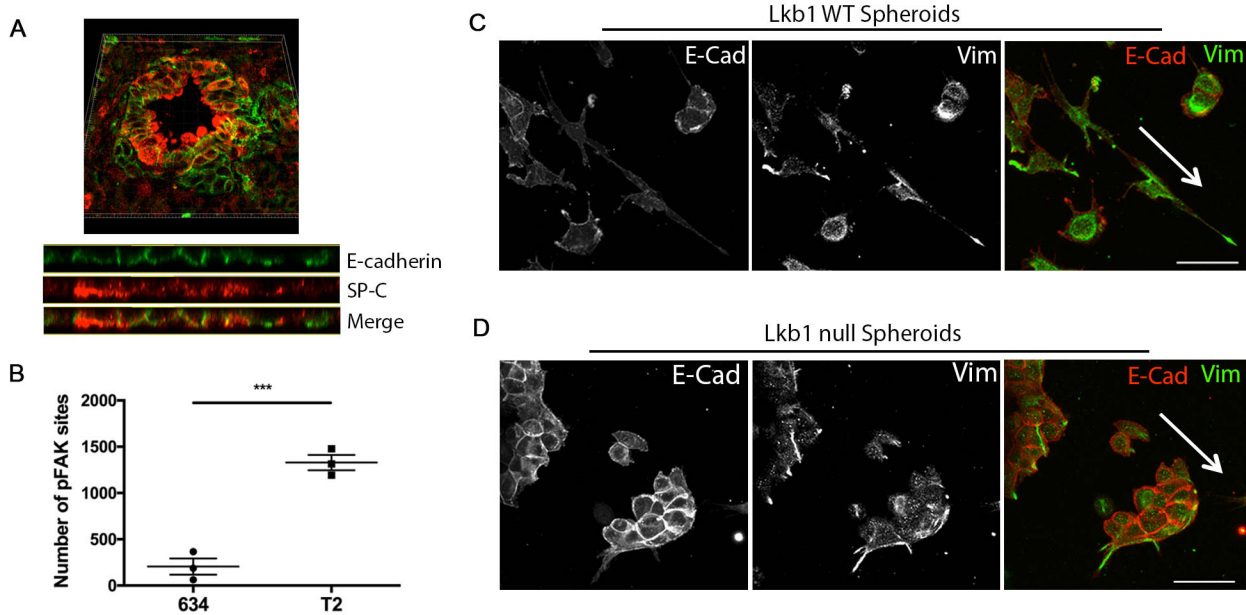

**Supplemental Figure 2. Kras, Lkb1-mutant collective invasion packs (CIPs) maintain junctional E-Cadherin in vivo and in vitro.** (A) (Top) 3D reconstruction of z-stack confocal images of a CIP expressing both SP-C (red) and E-Cadherin (green). (Bottom) A YZ cross-section was generated to highlight junctional E-Cadherin. (B) Number of pYFAK<sup>397</sup> sites at the invasive front in Lkb1 WT and Lkb1 null spheroids after 48 hours of invasion into a collagen matrix (each box represents an independent spheroid). Data are represented as mean (SD). *P* values were calculated using a 2-tailed Student's *t*-test. \*\*\**P*<.001. Confocal images of the invasive front of Lkb1 WT (C) or Lkb1 null (D) spheroids embedded in a collagen matrix and stained for E-Cad (red in merge) and Vimentin (Vim, green in merge). White arrows mark the direction of invasion. Scale bar = 50µm. Data are representative images from 3 independent experiments.

## Supplemental Figure 3

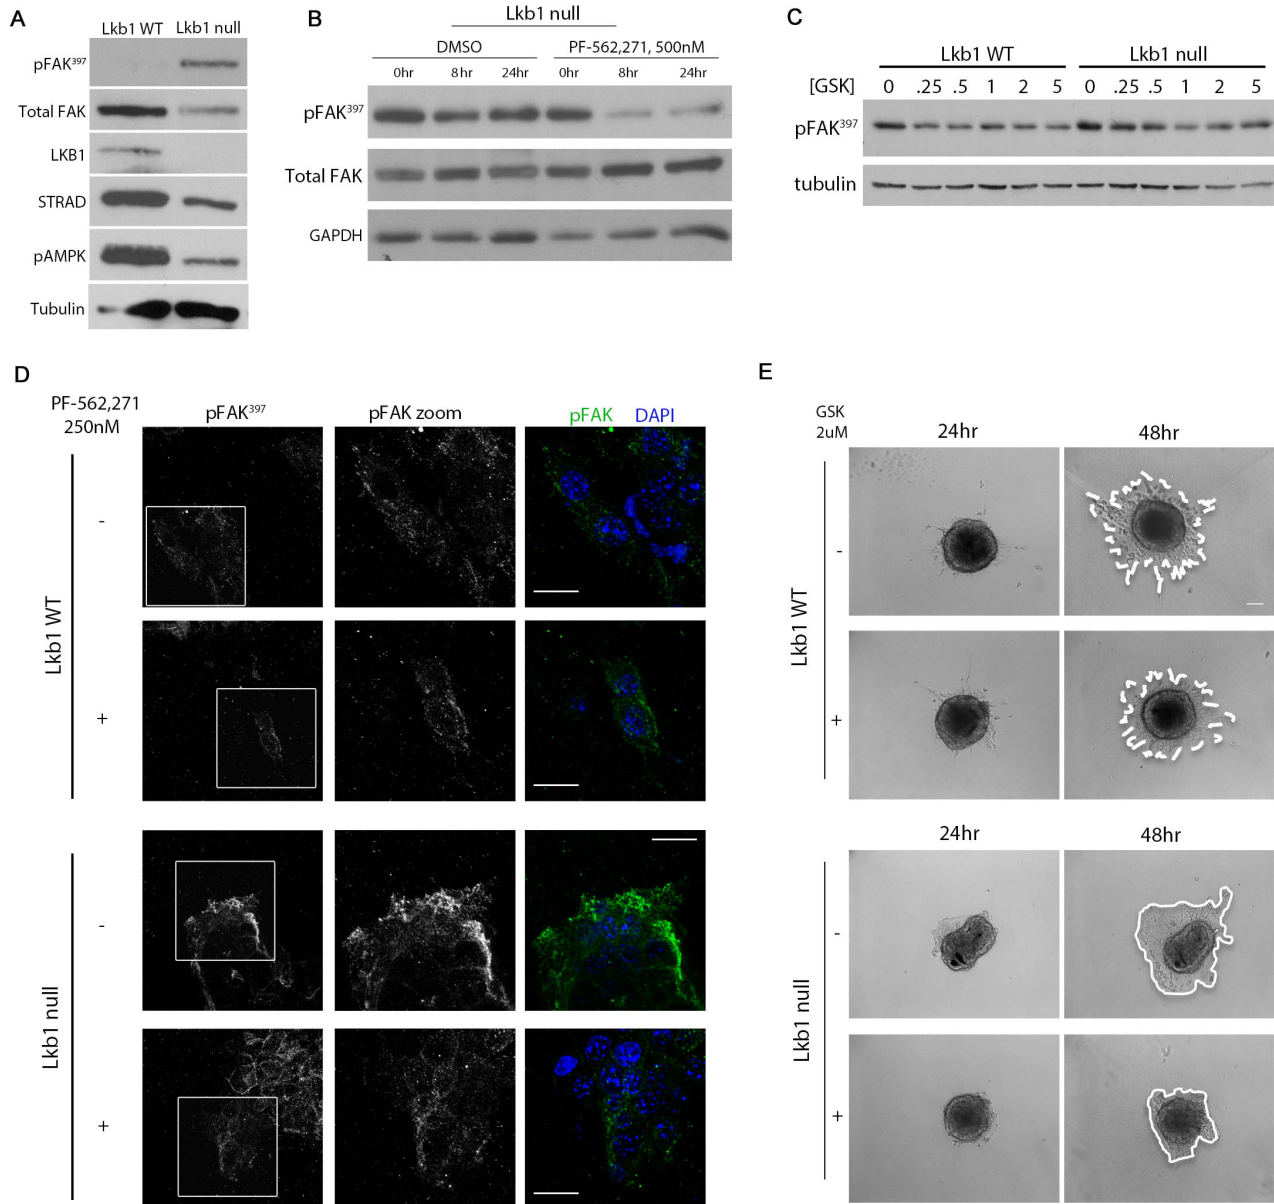

**Supplemental Figure 3. Efficacy of FAK inhibitors on 3D mouse tumor spheroids** (A) Western analysis of Lkb1 pathway signaling in Lkb1 WT and Lkb1 null mouse tumor cells. (B) Western showing efficacy of the FAK inhibitor PF-562,271 over time on Lkb1 null mouse tumor cells (C) Western showing efficacy of GSK2256098 in Lkb1 WT and Lkb1 null tumor cells. (D) Immunofluorescence for pYFAK<sup>397</sup> on Lkb1 WT and Lkb1 null spheroids embedded in collagen in the presence of either DMSO control or 250nM of PF-562,271. Immunofluorescence analysis was performed on pYFAK<sup>397</sup> 48 hours post-embedding. Scale bar = 50um. (E) Representative images of Lkb1 WT (top) and Lkb1 null (bottom) tumor spheroids treated with either DMSO or GSK6098 (GSK) and embedded into collagen. Invasion was measured after 48hrs. Scale bar = 50um.

## Supplemental Figure 4

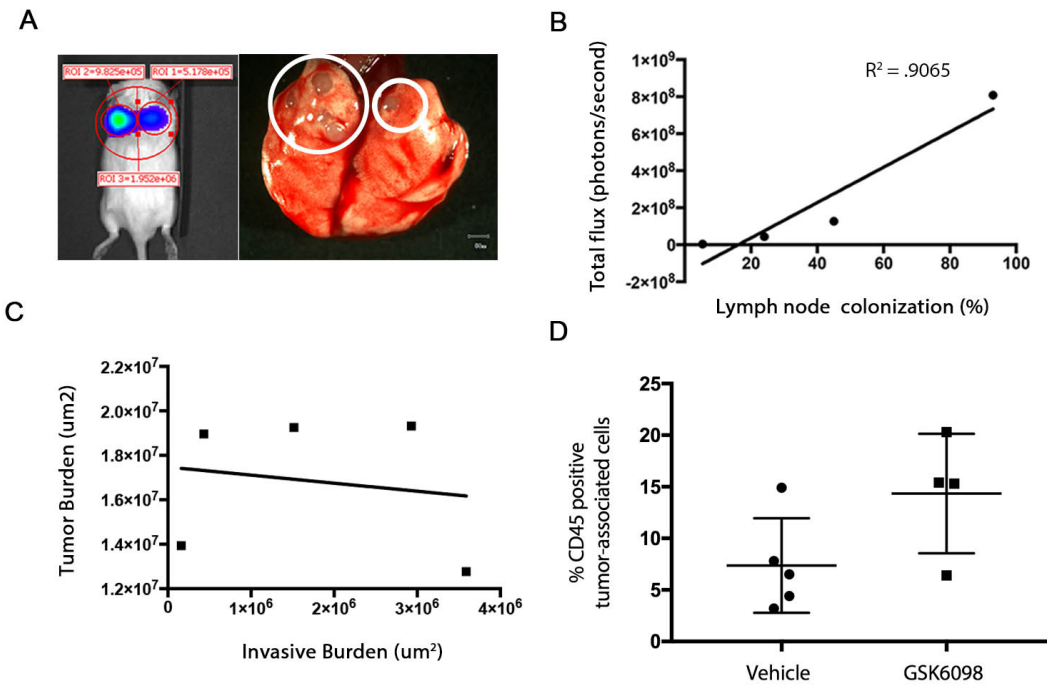

**Supplemental Fig. 4. Bioluminescent output is proportional to tumor burden and LN colonization in *KLL*<sub>Lenti</sub> mice, and GSK6098 treatment increases the tumor-associated leukocytes. (A)** Region of interest (ROI) analysis of total flux and corresponding lungs in *KLL*<sub>Lenti</sub> mice. Tumors are outlined by white circles. Scale bar = 50mm **(B)** Regression plot of % LN colonization vs. total flux (p/s) in *KLL*<sub>Lenti</sub> mice. Linear regression,  $R^2 = .9065$ ,  $P = .0479$ . **(C)** Regression plot of tumor burden ( $\mu\text{m}^2$ ) vs. invasive burden ( $\mu\text{m}^2$ ). Linear regression,  $R^2 = .02886$   $P = \text{ns}$ . **(D)** % Tumor associated, CD45-positive leukocytes in Vehicle vs. GSK6098 short-term treated mice. Each dot represents an individual mouse. 2-tailed  $t$  test;  $P = .0819$ .

### Supplemental Table 1.

| <b>Tumor Grade</b> | <b>Vehicle (%)</b> | <b>GSK6098 (%)</b> |
|--------------------|--------------------|--------------------|
| Grade I            | 7 (9.1)            | 13 (25.0)          |
| Grade II           | 62 (80.5)          | 37 (71.2)          |
| Grade III          | 3 (3.9)            | 0 (0.0)            |
| Grade IV           | 5 (6.5)            | 2 (3.9)            |

### Supplemental Table 1.

Total and percent tumor grade in short-term Vehicle vs. GSK6098-treated mice. Fisher's exact test;  $P = .053$ .

## Supplemental Table 2. Mice used in pre-clinical studies

| Mouse ID | DOB      | Sex | Treatment     | Length of Treatment |
|----------|----------|-----|---------------|---------------------|
| 2404     | 8/22/14  | M   | Vehicle       | 5 weeks             |
| 2410     | 8/22/14  | M   | Vehicle       | 5 weeks             |
| 2383     | 8/12/14  | F   | Vehicle       | 5 weeks             |
| 2468     | 9/17/14  | F   | Vehicle       | 5 weeks             |
| 2517     | 11/30/14 | F   | Vehicle       | 5 weeks             |
| 2529     | 12/10/14 | M   | Vehicle       | 5 weeks             |
| 2535     | 12/10/14 | F   | Vehicle       | 5 weeks             |
| 2541     | 12/9/14  | F   | Vehicle       | 5 weeks             |
| 2549     | 12/14/14 | F   | Vehicle       | 5 weeks             |
| 2550     | 12/14/14 | F   | Vehicle       | 5 weeks             |
| 2451     | 9/8/14   | M   | GSK (75mg/kg) | 5 weeks             |
| 2465     | 9/17/14  | M   | GSK (75mg/kg) | 5 weeks             |
| 2472     | 9/22/14  | M   | GSK (75mg/kg) | 5 weeks             |
| 2474     | 9/22/14  | F   | GSK (75mg/kg) | 5 weeks             |
| 2478     | 9/23/14  | F   | GSK (75mg/kg) | 5 weeks             |
| 2479     | 9/23/14  | F   | GSK (75mg/kg) | 5 weeks             |
| 2484     | 9/30/14  | F   | GSK (75mg/kg) | 5 weeks             |
| 2394     | 8/13/14  | F   | GSK (75mg/kg) | 5 weeks             |
| 2515     | 11/30/14 | F   | GSK (75mg/kg) | 5 weeks             |

| Mouse ID | DOB     | Sex | Treatment | Days to onset of clinical symptoms |
|----------|---------|-----|-----------|------------------------------------|
| 2671     | 4/30/15 | F   | Vehicle   | 65                                 |
| 2703     | 5/20/15 | M   | Vehicle   | 8                                  |
| 2711     | 5/26/15 | F   | Vehicle   | 9                                  |
| 2733     | 6/12/15 | F   | Vehicle   | 34                                 |
| 2736     | 6/12/15 | M   | Vehicle   | 48                                 |
| 2741     | 6/12/15 | F   | Vehicle   | 16                                 |
| 2702     | 5/26/15 | F   | Vehicle   | 70                                 |
| 2684     | 4/30/15 | F   | Vehicle   | 64                                 |

|       |         |   |               |    |
|-------|---------|---|---------------|----|
| 2709  | 5/26/15 | F | Vehicle       | 73 |
| 2750  | 6/22/15 | F | Vehicle       | 77 |
| 2739  | 6/12/15 | M | Vehicle       | 77 |
| 2746  | 6/22/15 | M | Vehicle       | 72 |
| 2715* | 5/29/15 | M | GSK (75mg/kg) | 45 |
| 2716  | 5/29/15 | M | GSK (75mg/kg) | 58 |
| 2688  | 5/19/15 | M | GSK (75mg/kg) | 67 |
| 2670  | 4/30/15 | F | GSK (75mg/kg) | 71 |
| 2673  | 4/30/15 | F | GSK (75mg/kg) | 70 |
| 2748  | 6/22/15 | M | GSK (75mg/kg) | 76 |
| 2730  | 6/1/15  | F | GSK (75mg/kg) | 74 |
| 2725  | 6/1/15  | F | GSK (75mg/kg) | 72 |
| 2695  | 5/26/15 | M | GSK (75mg/kg) | 78 |
| 2691  | 5/19/15 | F | GSK (75mg/kg) | 75 |
| 2719* | 5/29/15 | F | GSK (75mg/kg) | 19 |

\* censored (2715 died from severe fight wounds and 2719 died from systemic infection).

### Supplemental Table 3

| Genotype          | pYFAK |         |
|-------------------|-------|---------|
|                   | Focal | Diffuse |
| <i>KRAS</i>       | 1     | 6       |
| <i>KRAS, LKBI</i> | 5     | 1       |

### Supplemental Table 3

Contingency table of *KRAS* and *KRAS, LKBI* lung adenocarcinoma patient tumors that exhibited focally upregulated (Focal) vs. majority diffuse (Diffuse) pYFAK<sup>397</sup> staining pattern. Fisher's exact test  $P = 0.0291$ .
